# Supplementary material
Source: PubMed Central journal article supplement (PMC9539728)
Supplement: jamaotolaryngolheadnecksurg-e223031-s002.pdf [file jamaotolaryngolheadnecksurg-e223031-s002.pdf]

## Data Sharing Statement

Kukkala. Association of Apnea vs Hypopnea Predominance With Pediatric Sleep Apnea Outcomes. *JAMA Otolaryngol Head Neck Surg*. Published October 06, 2022.  
doi:10.1001/jamaoto.2022.3031

### Data

**Data available:** Yes

**Data types:** Deidentified participant data

**How to access data:** <https://sleepdata.org/datasets/chat>

**When available:** beginning date: 01-01-2014

### Supporting Documents

**Document types:** None

### Additional Information

**Who can access the data:** Researchers whose proposed use of the data has been approved

**Types of analyses:** To publish pertinent manuscripts

**Mechanisms of data availability:** approval of a proposal
